# Supplementary material for: CRISPR for companion diagnostics in low-resource settings
Source: Royal Society of Chemistry journal article supplement (doi:10.1039/d4lc00340c), 2024-01-01
Supplement: d4lc00340c1.pdf [file d4lc00340c1.pdf]

**Table S1** CRISPR-based diagnostics for TB and drug-resistant TB

| Effector    | Strategy                                                                                                                         | Target                                                                                                                                             | DNA extraction                                                       | Sample                                                                          | Time  | LOD                                                                         | Sensitivity                                                                            | Specificity                                                    | Ref            |
|-------------|----------------------------------------------------------------------------------------------------------------------------------|----------------------------------------------------------------------------------------------------------------------------------------------------|----------------------------------------------------------------------|---------------------------------------------------------------------------------|-------|-----------------------------------------------------------------------------|----------------------------------------------------------------------------------------|----------------------------------------------------------------|----------------|
| Cas1 2a     | A recombinase polymerase amplification (RPA) step with CRISPR-based detection                                                    | <i>Mtb</i> IS6110                                                                                                                                  | A combination strategy of beads beating, chemical lysis, and heating | Sputum                                                                          | 1.5h  | 5 copies/ $\mu$ L                                                           | 79%                                                                                    | 98%                                                            | <sup>237</sup> |
| Cas1 2b     | TB-QUICK: loop-mediated isothermal amplification (LAMP) and CRISPR/Cas12b detection                                              | <i>Mtb</i> IS6110                                                                                                                                  | QIAamp Blood Mini Kit and QIAamp Circulating Nucleic Acid Kit        | Pulmonary (sputum, bronchoalveolar lavage fluid) or plasma samples              | 2h    | 1.3 copy/ $\mu$ L                                                           | Pulmonary: 86.8%<br>Plasma: 41.2% for AFB-positive and 31.7% for AFB-negative patients | 95.2%                                                          | <sup>238</sup> |
| Lba Cas1 2a | CRISPR detection of circulating cell-free Mycobacterium tuberculosis DNA in adults and children, including children with HIV     | <i>Mtb</i> IS6110, <i>esxB</i> , <i>gyrB</i>                                                                                                       | The Quick-cfDNA Serum & Plasma                                       | Serum                                                                           | 2h    | 0.06 copy/ $\mu$ L                                                          | 68%-100%                                                                               | -                                                              | <sup>160</sup> |
| LwCas13a    | A sensitive Mycobacterium tuberculosis (MTB) complex polymerase chain reaction (PCR)-CRISPR/Cas13a detection method (CRISPR-MTB) | <i>Mtb</i> IS1081                                                                                                                                  | Conventional DNA extraction                                          | Sputum, BALF, and pus samples                                                   |       | 1 target sequence copy/ $\mu$ L                                             | 97.2%-100%                                                                             | 95.5%                                                          | <sup>239</sup> |
| Cas9        | A CRISPR/Cas-9-mediated fluorescent strategy utilizing fluorescence resonance energy transfer (FRET)                             | High-variable region of <i>M. tuberculosis</i> 16S rDNA fragment                                                                                   | -                                                                    | Simulated sputum samples                                                        | 2h    | 20 CFU mL <sup>-1</sup>                                                     | -                                                                                      | -                                                              | <sup>240</sup> |
| Cas1 2b     | CRISPR/CRISPR-associated 12b nuclease CRISPR/Cas12b-based multiple cross displacement amplification technique (CRISPR-MCDA)      | <i>Mtb</i> IS6110                                                                                                                                  | Genomic DNA extraction kits                                          | Sputum                                                                          | 70min | 5 fg/ $\mu$ L of genomic DNA extracted from the MTB reference strain H37Rv. | -                                                                                      | 100%                                                           | <sup>241</sup> |
| Cas9        | Finding Low Abundance Sequences by Hybridization (FLASH)                                                                         | FLASH to amplify 52 candidate genes probably associated with resistance to first- and second-line drugs in the <i>Mtb</i> reference strain (H37Rv) | Mechanical disruption method                                         | The laboratory H37Rv <i>Mtb</i> reference strain, cultured isolates, and sputum | -     | -                                                                           | -                                                                                      | Drug resistance predictions for 15/16 (93.7%) clinical samples | <sup>171</sup> |
| Cas9        | A Cas9/gRNA-assisted quantitative real-time PCR (qRT-PCR) (CARP) assay                                                           | S531 and H526 positions in the rifampicin (RIF)-resistance-determining region (RRDR) of the <i>Mtb</i> <i>rpoB</i> gene                            | -                                                                    | <i>M. tuberculosis</i> genomic DNA template                                     | ~4h   | less than 0.0001 femtogram of mycobacterial genomic DNA.                    | -                                                                                      | 100%                                                           | <sup>170</sup> |
